# Supplementary material for: Cohort profile: AI-driven national Platform for CCTA for clinicaL and industriaL applicatiOns (APOLLO)
Source: PubMed Central journal article supplement — BMJ Open. 2024 Dec 2;14(12):e089047. doi: 10.1136/bmjopen-2024-089047 (PMC11624714; doi:10.1136/bmjopen-2024-089047), 2024-12-02
Supplement: bmjopen-14-12-s001.pdf [file bmjopen-14-12-s001.pdf]

## Supplemental Material

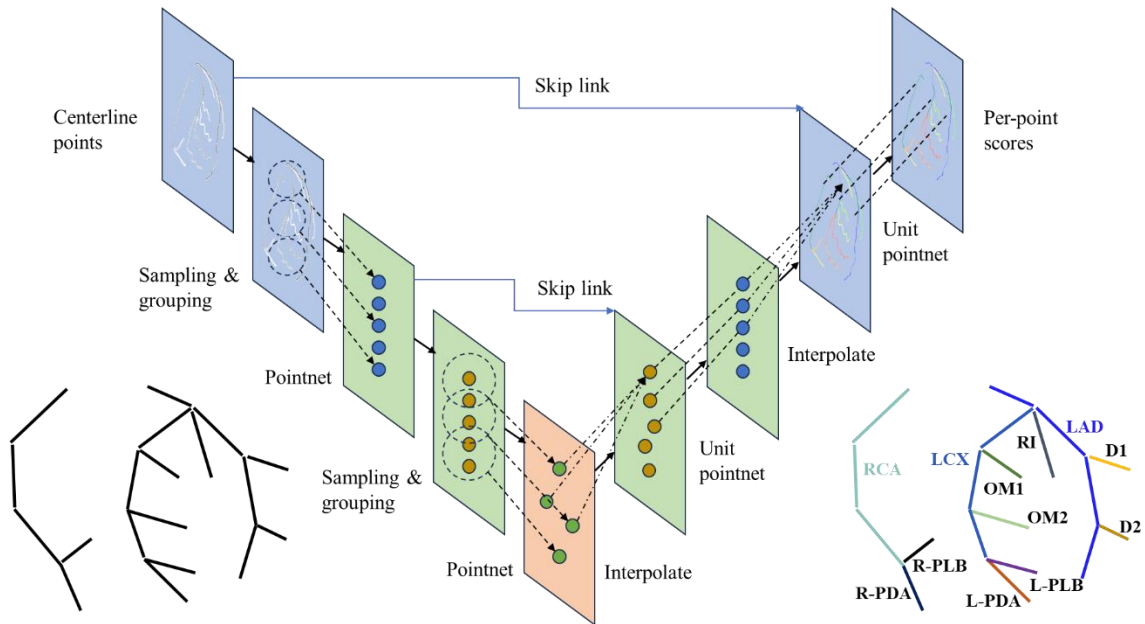

**Supplemental Figure 1.** Diagram of graph PointNet for coronary artery segment labelling.

LAD: left anterior descending; LCX: left circumflex; LM: left main; RCA: right coronary artery; D1: first diagonal artery; D2: second diagonal artery; OM1, OM2: obtuse marginal arteries; RI: ramus intermedius; R-PLB: right posterior lateral branch; R-PDA: right posterior descending artery; L-PLB: left posterior lateral branch; L-PDA: left posterior descending artery.

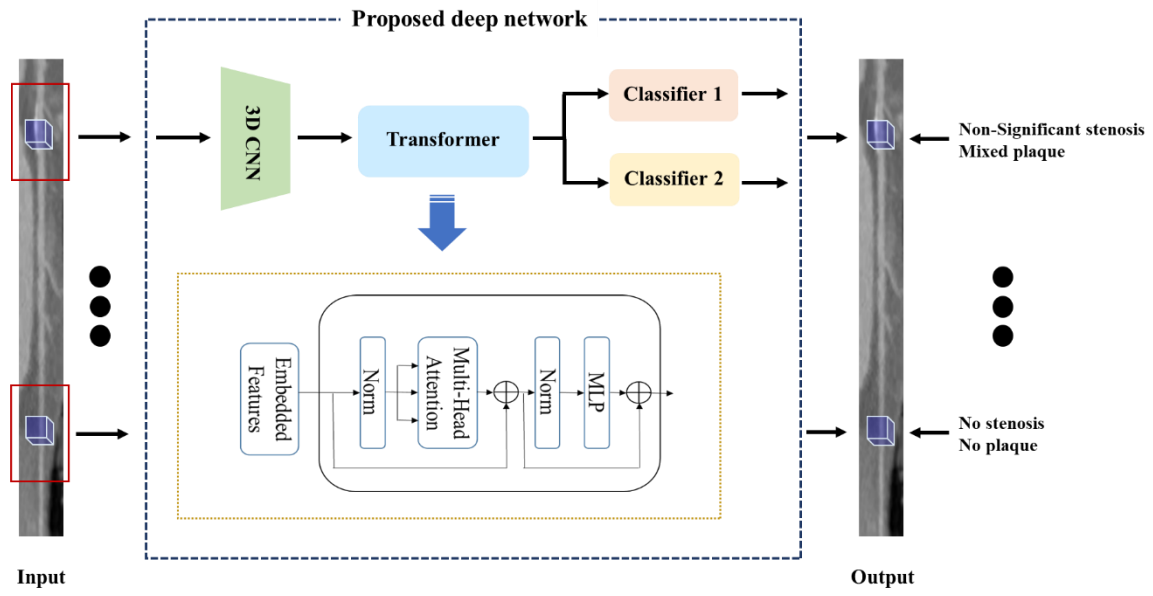

**Supplemental Figure 2.** Multiple-target three-dimensional (3D) Transformer on 3D image classifier for joint stenosis grading, plaque quantification and characterization. CNN: convolutional neural networks.

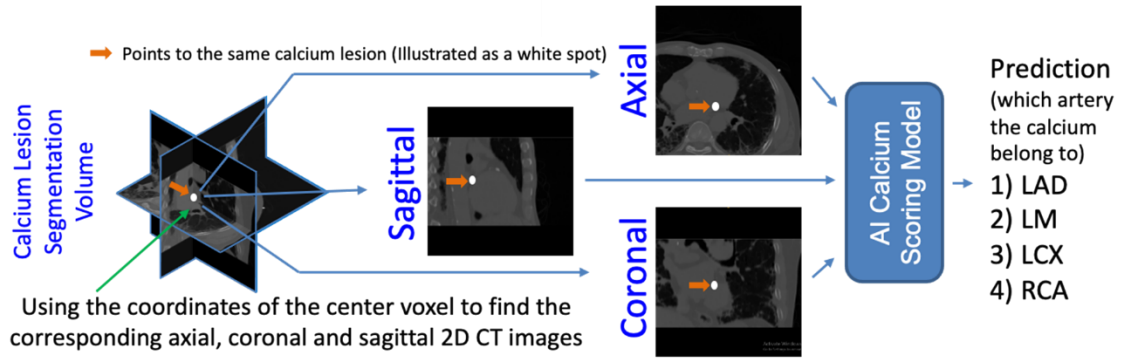

**Supplemental Figure 3.** Workflow for calcium score quantification using convolutional neural networks (CNN). LM: left main; LAD: left anterior descending; LCX: left circumflex; LM: left main; RCA: right coronary artery.

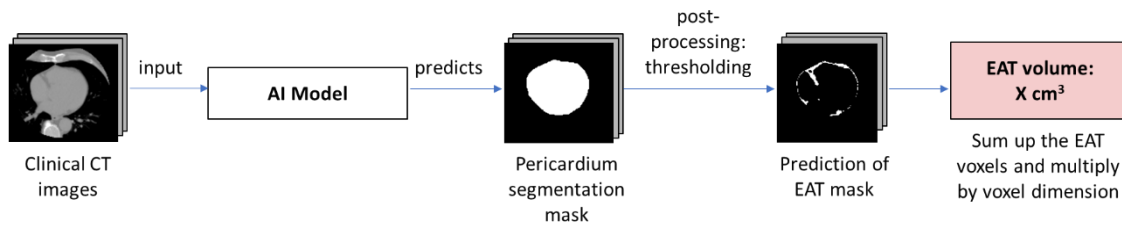

**Supplemental Figure 4.** Workflow for AI EAT quantification. AI: artificial intelligence; EAT: epicardial adipose tissue.
